# Supplementary material for: The Immunoscore in Localized Urothelial Carcinoma Treated with Neoadjuvant Chemotherapy: Clinical Significance for Pathologic Responses and Overall Survival
Source: PubMed Central journal article supplement (PMC7865364; doi:10.3390/cancers13030494), 2021-01-28
Supplement: cancers-13-00494-s001.pdf [file cancers-13-00494-s001.pdf]

Supplementary Materials:

# The Immunoscore in Localized Urothelial Carcinoma Treated with Neoadjuvant Chemotherapy: Clinical Significance for Pathologic Responses and Overall Survival

Elise F. Nassif, Bernhard Mlecnik, Constance Thibault, Marie Auvray, Daniela Bruni, Alexandre Colau, Eva Compérat, Gabriela Bindea, Aurélie Catteau, Aurélie Fugon, Isabelle Boquet, Marine Martel, Philippe Camparo, Pierre Colin, Roubini Zakopoulou, Aristotelis Bamias, Mostefa Bennamoun, Xavier Barthere, Bruno D’acremont, Marine Lefevre, Francois Audenet, Arnaud Mejean, Virginie Verkarre, Stéphane Oudard and Jérôme Galon

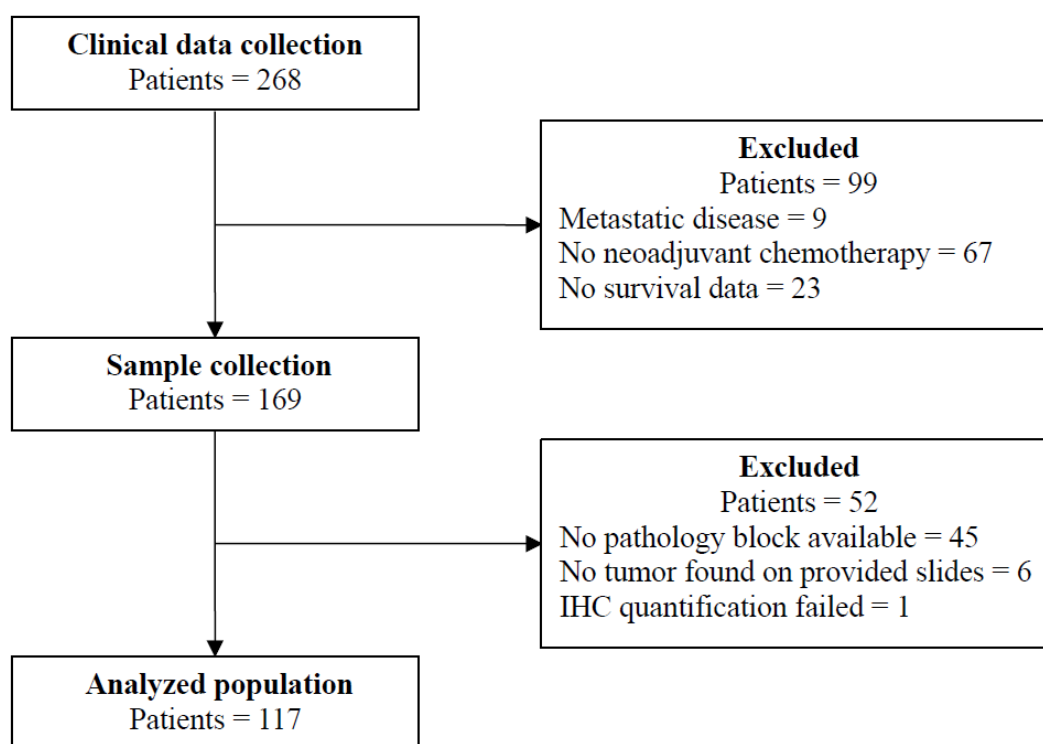

**Figure S1.** The localized UC study design. Biomarker exclusion and clinical a data exclusion prior to analysis.

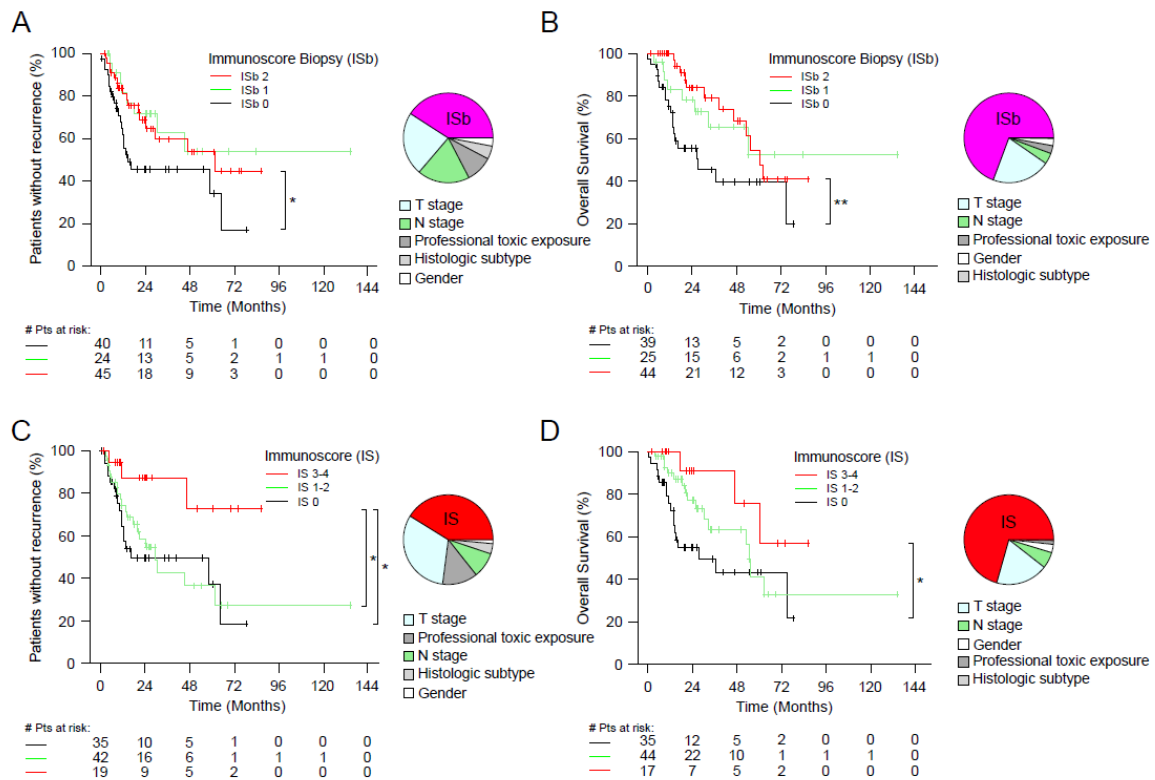

**Figure S2.** The impact of Immunoscore on the patient outcome. Kaplan-Meier curves for Immunoscore (IS) are shown for TTR (A, C) and OS (B, D). Pie chart indicates the contribution of X2 proportion of ISb and IS among other variables for influencing survival in multivariate analysis. (A-B) Immunoscore three categories for Immunoscore biopsy: ISb 0 (black), ISb 1 (green) and ISb 2 (red). (C-D) Immunoscore three categories for Immunoscore: IS 0 (black), IS 1-2 (green) and IS 3-4 (red). \* P<0.05; \*\* P < 0.01.

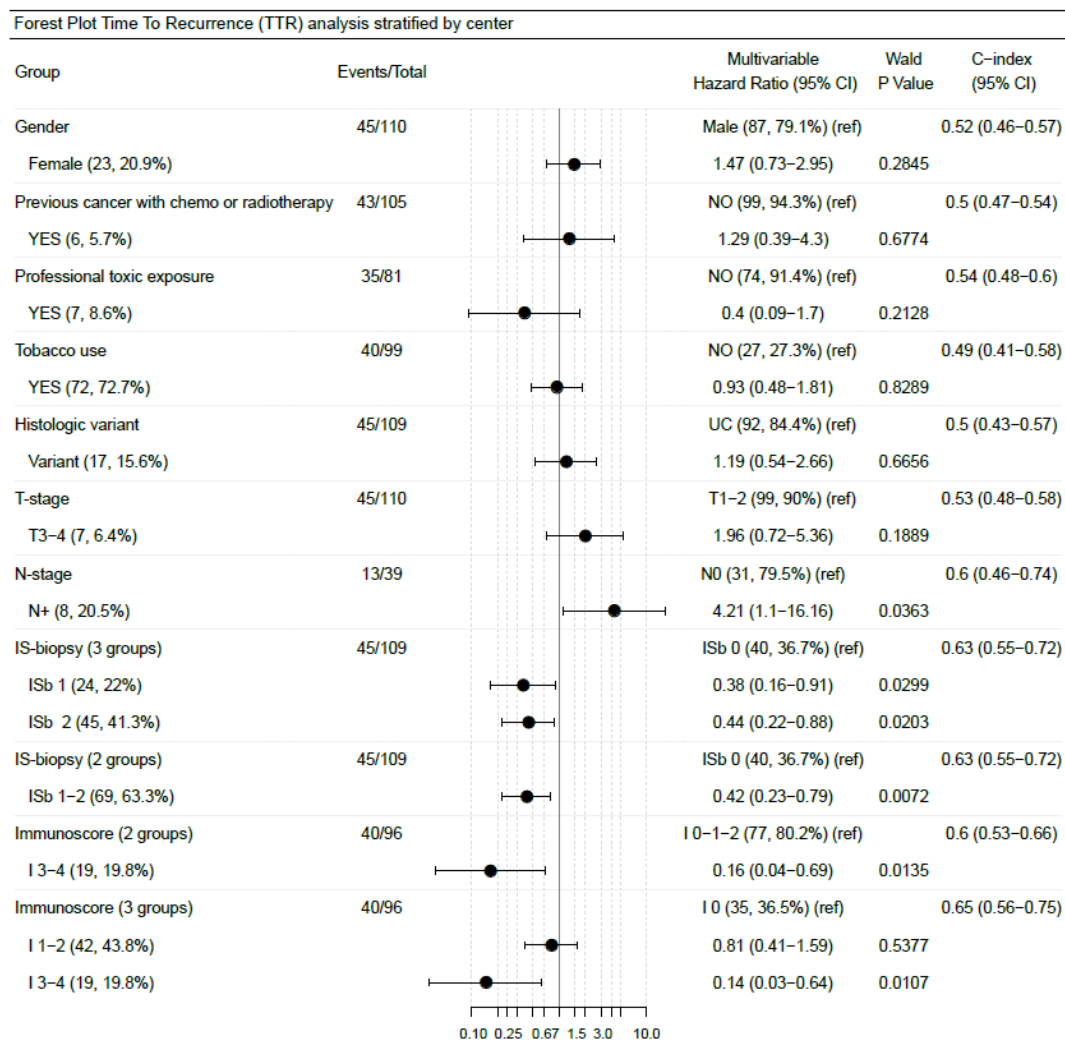

**Figure S3.** Forest plot for the impact of clinical parameters and Immunoscore on the patient outcome. Bi-variate Cox models stratified by participating center for clinical parameters and Immunoscore.

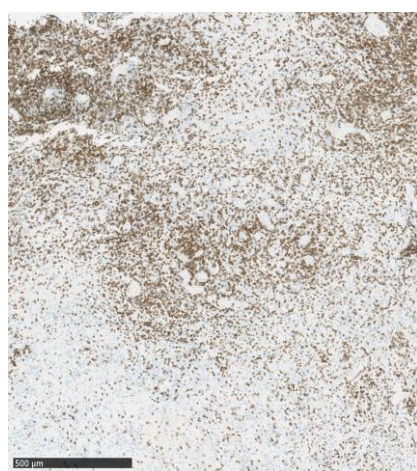

A

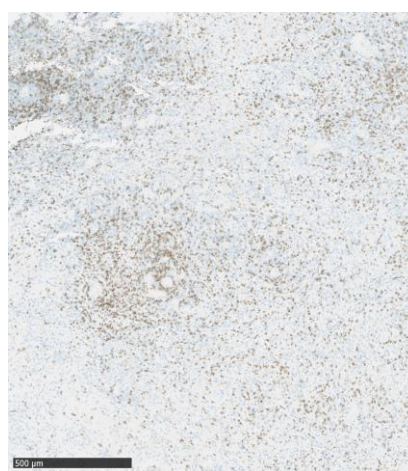

B

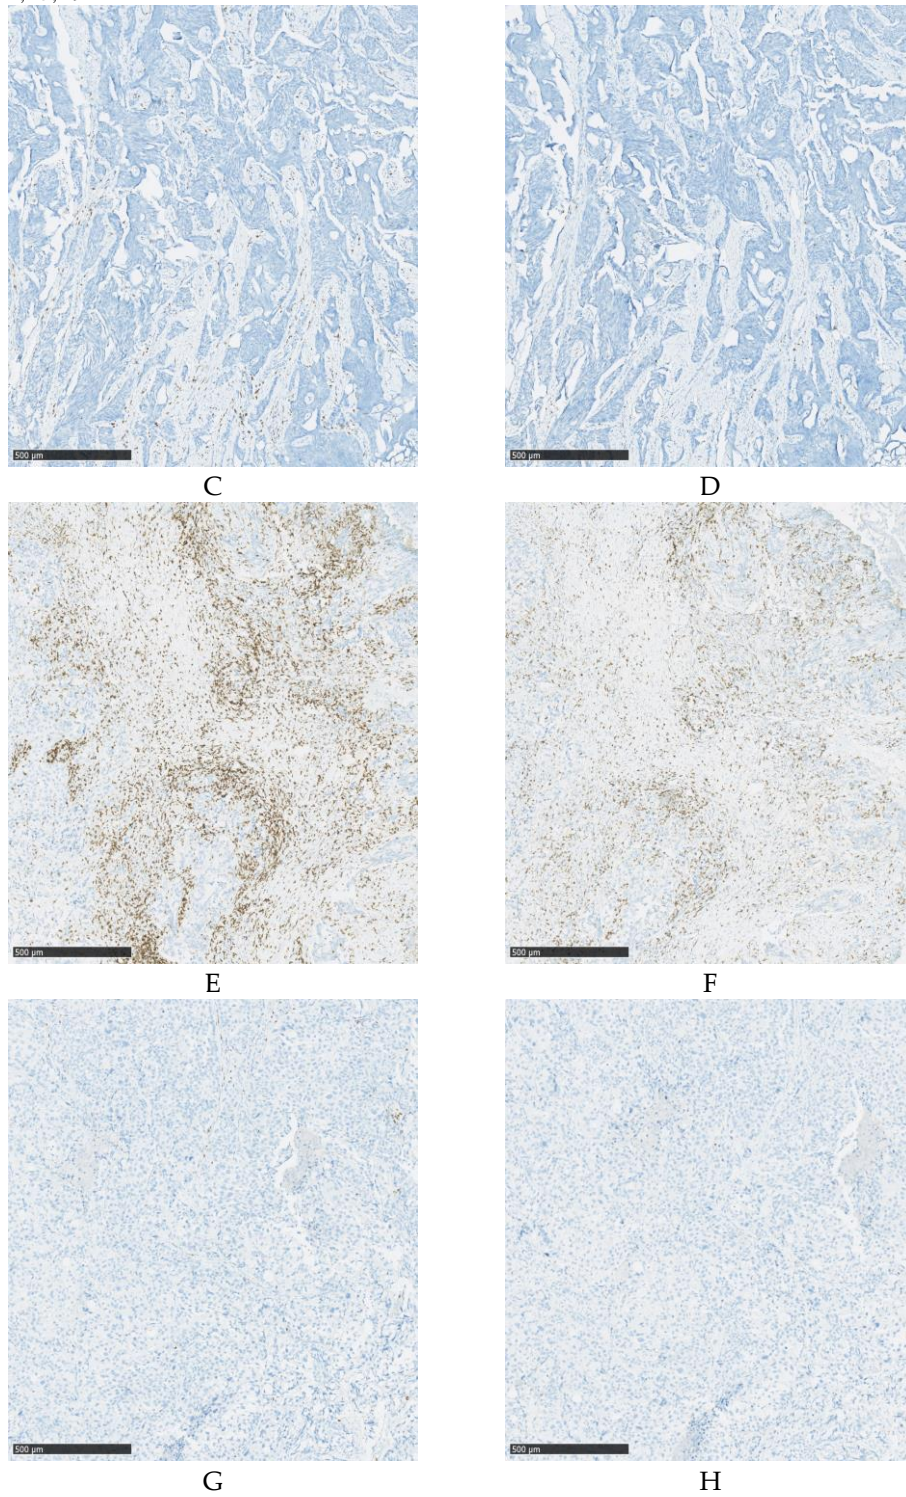

**Figure S4.** Pathology slides for Immunoscore determination (A) CD3 immunohistochemistry (IHC) in IS-4 patient (B) CD8 IHC in IS-4 patient (C) CD3 IHC in IS-0 patient (D) CD8 IHC in IS-0 patient (E) CD3 IHC in ISb-2 patient (F) CD8 IHC in ISb-2 patient (G) CD3.



B

Table S1: Bivariable analysis for Clinical Parameters for OS

|                                                                 | Number of patients (%) | Median months (95% CI) | Rate at          |                  | Overall Survival (OS)                       |          |                  | RMST Rel. Months (95% CI) | P value** |
|-----------------------------------------------------------------|------------------------|------------------------|------------------|------------------|---------------------------------------------|----------|------------------|---------------------------|-----------|
|                                                                 |                        |                        | 3 yr % (95% CI)  | 5 yr % (95% CI)  | Unadjusted stratified by center HR (95% CI) | P value* | C-index (95% CI) |                           |           |
| <b>Sex</b>                                                      |                        |                        |                  |                  |                                             |          | 0.51 (0.43–0.58) |                           |           |
| Male                                                            | 86 (78.9)              | 60.5 (32.9-NR)         | 62.7 (51.5-76.4) | 50.2 (37.3-67.5) | 1.0 (reference)                             |          |                  | 0.0 (reference)           |           |
| Female                                                          | 23 (21.1)              | 53.1 (5.9-74.8)        | 64.3 (44.5-92.8) | 37.5 (15-94)     | 0.99 (0.44–2.22)                            | 0,9828   |                  | -2.3 (-17.9-13.2)         | 0,7683    |
| <b>Previous cancer with chemotherapy or pelvic radiotherapy</b> |                        |                        |                  |                  |                                             |          | 0.5 (0.45–0.54)  |                           |           |
| No                                                              | 100 (95.2)             | 55.3 (32.9-74.8)       | 64.1 (53.8-76.3) | 48.1 (35.8-64.5) | 1.0 (reference)                             |          |                  | 0.0 (reference)           |           |
| Yes                                                             | 5 (4.8)                | NR                     | 80 (51.6-100)    | NR (NR-NR)       | 0.76 (0.1–5.72)                             | 0,7914   |                  | 6.5 (-9.4-22.4)           | 0,4242    |
| <b>Professional toxic exposure</b>                              |                        |                        |                  |                  |                                             |          | 0.52 (0.43–0.6)  |                           |           |
| No                                                              | 73 (89)                | 55.3 (27.4-NR)         | 60.7 (48.6-75.7) | 46.3 (32.5-65.9) | 1.0 (reference)                             |          |                  | 0.0 (reference)           |           |
| Yes                                                             | 9 (11)                 | NR                     | 77.8 (54.9-100)  | 77.8 (54.9-100)  | 0.64 (0.19–2.16)                            | 0,4688   |                  | 9.8 (-13.1-32.7)          | 0,4001    |
| <b>Tobacco use</b>                                              |                        |                        |                  |                  |                                             |          | 0.54 (0.44–0.63) |                           |           |
| No                                                              | 24 (24.7)              | 74.8 (5.2-NR)          | 63.9 (45.2-90.3) | 63.9 (45.2-90.3) | 1.0 (reference)                             |          |                  | 0.0 (reference)           |           |
| Yes                                                             | 73 (75.3)              | 55.3 (30.6-NR)         | 63 (50.8-78)     | 46.3 (31.7-67.6) | 1.51 (0.67–3.44)                            | 0,3220   |                  | -8.4 (-24.5-8.2)          | 0,3202    |
| <b>Histologic variant</b>                                       |                        |                        |                  |                  |                                             |          | 0.51 (0.43–0.58) |                           |           |
| UC                                                              | 93 (85.3)              | 55.3 (32.9-NR)         | 64.9 (54.1-77.8) | 47.7 (34.2-66.6) | 1.0 (reference)                             |          |                  | 0.0 (reference)           |           |
| Variant                                                         | 16 (14.7)              | 36.8 (12.4-74.8)       | 53.4 (31.3-91.2) | 42.7 (21.4-85.3) | 1.4 (0.64–3.08)                             | 0,3990   |                  | -7.8 (-24.5-8.8)          | 0,3557    |
| <b>T-stage</b>                                                  |                        |                        |                  |                  |                                             |          | 0.49 (0.47–0.51) |                           |           |
| T2                                                              | 99 (90.8)              | 60.5 (36.8-NR)         | 66.2 (56.2-78)   | 52.4 (40.2-68.4) | 1.0 (reference)                             |          |                  | 0.0 (reference)           |           |
| T3-4                                                            | 6 (5.5)                | 25.8 (17.5-30.6)       | NR (NR-NR)       | NR (NR-NR)       | 1.85 (0.52–6.58)                            | 0,3421   |                  | 1.3 (-3.7-6.3)            | 0,6124    |
| <b>N-stage</b>                                                  |                        |                        |                  |                  |                                             |          | 0.55 (0.38–0.73) |                           |           |
| N0                                                              | 26 (76.5)              | 36.8 (0.1-NR)          | 74.6 (53-100)    | 37.3 (8.9-100)   | 1.0 (reference)                             |          |                  | 0.0 (reference)           |           |
| N+                                                              | 8 (23.5)               | 25.8 (9.9-NR)          | 41.7 (14.7-100)  | NR (NR-NR)       | 1.96 (0.31–12.36)                           | 0,4734   |                  | -4.7 (-20.4-11)           | 0,5575    |
| <b>IS-biopsy (2 groups)</b>                                     |                        |                        |                  |                  |                                             |          | 0.7 (0.61–0.78)  |                           |           |
| ISb 0                                                           | 39 (36.1)              | 27.4 (13.9-74.8)       | 45.4 (29.9-68.8) | 39.7 (24.3-64.9) | 1.0 (reference)                             |          |                  | 0.0 (reference)           |           |
| ISb 1-2                                                         | 69 (63.9)              | 60.5 (38.8-NR)         | 73.8 (62-87.8)   | 53.2 (37.8-74.8) | 0.3 (0.15–0.59)                             | 0,0005   |                  | 15.8 (2.1-29.6)           | 0,0244    |
| <b>IS-biopsy (3 groups)</b>                                     |                        |                        |                  |                  |                                             |          | 0.73 (0.65–0.8)  |                           |           |
| ISb 0                                                           | 39 (36.1)              | 27.4 (13.9-74.8)       | 45.4 (29.9-68.8) | 39.7 (24.3-64.9) | 1.0 (reference)                             |          |                  | 0.0 (reference)           |           |
| ISb 1                                                           | 25 (23.1)              | NR                     | 65.4 (46.9-91.2) | 52.4 (30.2-90.7) | 0.34 (0.14–0.82)                            | 0,0167   |                  | 14.6 (-2.9-32)            | 0,1018    |
| ISb 2                                                           | 44 (40.7)              | 60.5 (38.8-NR)         | 79.2 (65.3-95.9) | 54.6 (35.9-83)   | 0.27 (0.12–0.6)                             | 0,0013   |                  | 17.2 (2.5-31.8)           | 0,0216    |
| <b>Immunoscore (2 groups)</b>                                   |                        |                        |                  |                  |                                             |          | 0.59 (0.53–0.65) |                           |           |
| IS 0-1-2                                                        | 79 (82.3)              | 54.4 (27.4-74.8)       | 57.3 (45.5-72.3) | 41.9 (28.3-62)   | 1.0 (reference)                             |          |                  | 0.0 (reference)           |           |
| IS 3-4                                                          | 17 (17.7)              | NR                     | 90.9 (75.4-100)  | 75.8 (50.6-100)  | 0.35 (0.1–1.19)                             | 0,0936   |                  | 21.2 (3.3-39.1)           | 0,0200    |
| <b>Immunoscore (3 groups)</b>                                   |                        |                        |                  |                  |                                             |          | 0.71 (0.62–0.79) |                           |           |
| IS 0                                                            | 35 (36.5)              | 27.4 (12.4-74.8)       | 49.5 (33.7-72.6) | 43.3 (27.2-68.9) | 1.0 (reference)                             |          |                  | 0.0 (reference)           |           |
| IS 1-2                                                          | 44 (45.8)              | 54.4 (21.2-NR)         | 63.4 (47.5-84.7) | 41.1 (23.1-73.3) | 0.43 (0.2–0.91)                             | 0,0281   |                  | 8.9 (-6.7-24.4)           | 0,2630    |
| IS 3-4                                                          | 17 (17.7)              | NR                     | 90.9 (75.4-100)  | 75.8 (50.6-100)  | 0.22 (0.06–0.78)                            | 0,0197   |                  | 23.1 (5.5-40.7)           | 0,0101    |

\* Wald P Value stratified by participating center. \*\* Restricted Mean Survival Time (RMST) P value. IS: Immunoscore; ISb Immunoscore biopsy like.

Table S2: Multivariable analysis Immunoscore vs clinical parameters for TTR and OS

|                                                     | TTR Model (45/110)*   |                      |                  | OS Model (40/110)*    |                      |                  |
|-----------------------------------------------------|-----------------------|----------------------|------------------|-----------------------|----------------------|------------------|
|                                                     | Hazard Ratio (95% CI) | P-value <sup>1</sup> | C-Index (95% CI) | Hazard Ratio (95% CI) | P-value <sup>1</sup> | C-Index (95% CI) |
| <b>Multivariable Cox Model stratified by center</b> |                       |                      | 0,71 (0.62-0.79) |                       |                      | 0,7 (0.6-0.79)   |
| <b>Immunoscore (3 groups)</b>                       |                       |                      |                  |                       |                      |                  |
| IS 1-2 vs IS 0                                      | 0.62 (0.29-1.33)      | 0,2214               |                  | 0.35 (0.16-0.8)       | 0,0121               |                  |
| IS 3-4 vs IS 0                                      | 0.14 (0.03-0.67)      | 0,0134               |                  | 0.17 (0.04-0.66)      | 0,011                |                  |
| Unclassified vs IS 0                                | 0.35 (0.12-1.05)      | 0,0602               |                  | 0.37 (0.12-1.17)      | 0,0908               |                  |
| <b>Gender</b>                                       |                       |                      |                  |                       |                      |                  |
| Female vs Male                                      | 1.23 (0.59-2.56)      | 0,5828               |                  | 0.75 (0.32-1.77)      | 0,5087               |                  |
| <b>Professional toxic exposure</b>                  |                       |                      |                  |                       |                      |                  |
| Yes vs No                                           | 0.25 (0.04-1.45)      | 0,1204               |                  | 0.75 (0.19-2.93)      | 0,6754               |                  |
| Unkown vs No                                        | 0.71 (0.22-2.31)      | 0,5637               |                  | 0.88 (0.26-3.02)      | 0,8451               |                  |
| <b>Histologic variant</b>                           |                       |                      |                  |                       |                      |                  |
| Variant vs UC                                       | 0.67 (0.26-1.71)      | 0,4009               |                  | 1.11 (0.44-2.78)      | 0,8244               |                  |
| Unkown vs UC                                        | 0 (0-Inf)             | 0,9979               |                  | -                     | -                    |                  |
| <b>T-stage</b>                                      |                       |                      |                  |                       |                      |                  |
| T3-4 vs T2                                          | 2.42 (0.76-7.67)      | 0,1345               |                  | 3.26 (0.81-13.21)     | 0,0976               |                  |
| Unknown vs T2                                       | 5.87 (1.19-28.92)     | 0,0298               |                  | 1 (0.18-5.52)         | 0,9976               |                  |
| <b>N-stage</b>                                      |                       |                      |                  |                       |                      |                  |
| N+ vs N0                                            | 2.48 (0.64-9.59)      | 0,1882               |                  | 1.31 (0.23-7.46)      | 0,7588               |                  |
| Unknown vs N0                                       | 1.26 (0.29-5.55)      | 0,7603               |                  | 2.11 (0.43-10.39)     | 0,3577               |                  |

\* (Events/Total); <sup>1</sup>Stratified covariate Wald p-value; Stratified by center. IS: Immunoscore
